# Supplementary figures and images for: Metabolomic Analysis of SCD during Goose Follicular Development: Implications for Lipid Metabolism
Source: MDPI journal article supplement (doi:10.3390/genes11091001), 2020-08-26

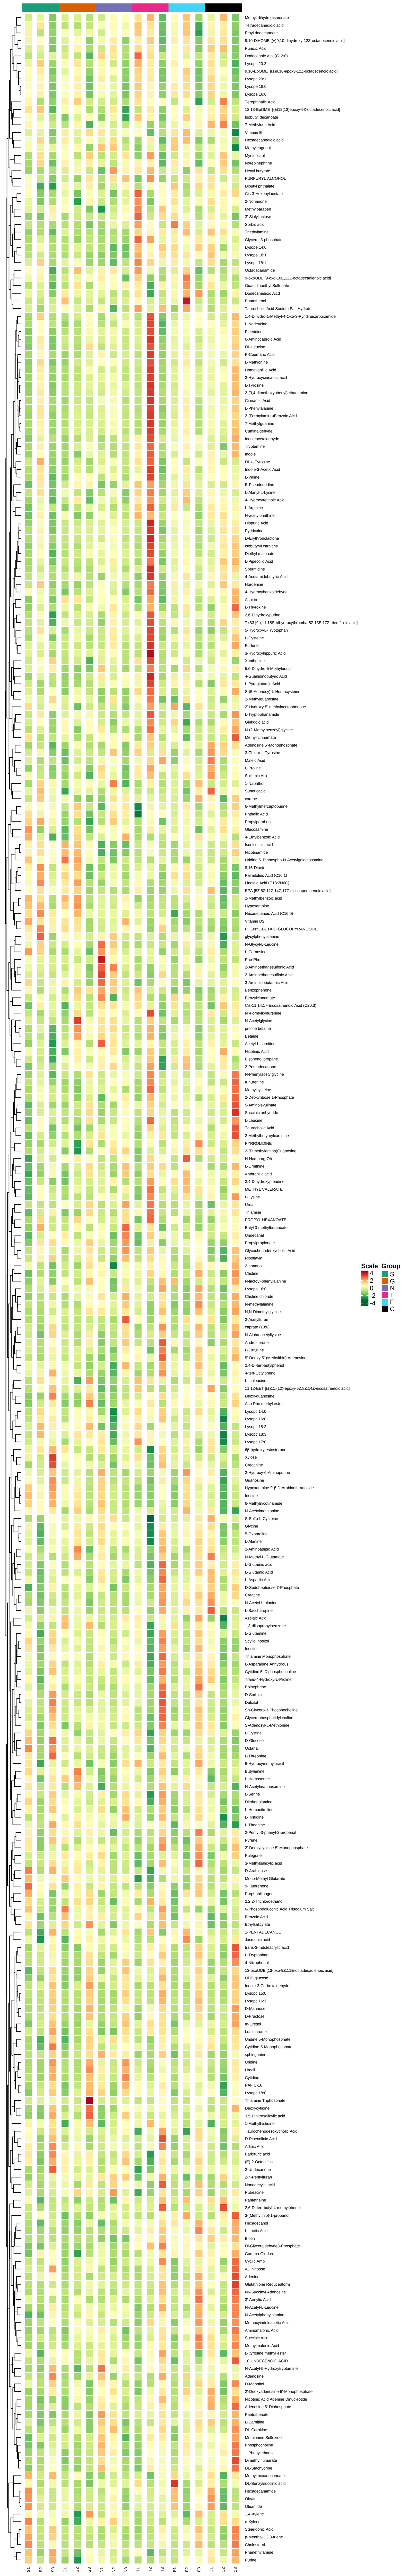

Supplement: s1 [file s1]
